# Supplementary material for: Agreement between BTS G-walk and GaitLab in spatiotemporal and pelvic angle measurements in active older adults
Source: PeerJ. 2025 Oct 27;13:e20189. doi: 10.7717/peerj.20189 (PMC12574596; doi:10.7717/peerj.20189)
Supplement: Supplemental Information 1 — All results obtained from the assessments in this research [file peerj-13-20189-s001.xlsx]

## Sheet: Piloto
	Sujeito	Situação	Ensaio	Cadência (passos/min)	Velocidade (m/s)	D- Comprimento de passada (m)	E- Comprimento de passada (m)	D- Comprimento de passo (m)	E- Comprimento de passo (m)	D- Tempo de apoio (%)	E- Tempo de apoio (%)	D- Tempo de balanço (%)	E- Tempo de balanço (%)	D- Tempo de apoio simples (%)	E- Tempo de apoio simples (%)	D- Tempo de apoio duplo (%)	E- Tempo de apoio duplo (%)	Inclinação pélvica (°)	Obliquidade pélvica (°)	Rotação pélvica (°)
	1	1	1	144.6	1.6	1.31	1.34	0.67	0.66	68.29	61.19	60.18	39.18	61.95	38.06	17.7	11.19
	1	1	2	109.2	1.2	1.3	1.28	0.65	0.64	52.34	63.47	38.31	37.64	36.69	39.3	12.05	13.1
	1	1	3	108.6	1.2	1.33	1.32	0.66	0.67	60.22	60.5		39.5	40.15		12.59
	1	1	4	112.2	1.3	1.35	1.33	0.67	0.67	61.93	62	37.43	39.62	38.17	38.86	12.2	12.38
	1	1	Média	118.65	1.3	1.32	1.32	0.66	0.66	60.69	61.79	45.31	38.98	44.24	38.74	13.64
	1	2	1	110.89	1	1.09	1.07	0.56026	0.52002	61.94	63.04	38.06	39.96	36.33	36.77	12.33	13.71
	1	2	2	110.64	1.22	1.33	1.33	0.688807	0.641193	61.88	63.19	38.12	36.81	36.78	37.73	12.55	12.73
	1	2	3	110.18	1.31	1.42	1.43	0.69	0.73	62.85	61.85	37.15	38.15	37.53	36.4	12.66	12.72
	1	2	4	116.73	1.36	1.44	1.43	0.685152	1.9542	64.59	62.99	35.41	37.01	38.18	36.34	13.2	13.3
	1	2	Média	112.11	1.2225	1.32	1.315	0.656055	0.961353	62.815	62.7675	37.185	37.9825	37.205	36.81	12.685	13.115
	2	1	1	106.8	1.2	1.27	1.33	0.67	0.63	59.75	61.05	39.36	39.04	38.83	39.57	9.75	10.96
	2	1	2	106.2	1.1	1.23	1.21	0.62	0.6	58.16	59.31	41.49	37.77	37.77	41.49	10.46	9.93
	2	1	3	111	1.2	1.24	1.26	0.63	0.62	59.25	60.48	40.75	40.44	41.12	40.07	9.72	9.1
	2	1	4	111.6	1.1	1.2	1.2	0.6	0.6	61.52	60.94	39.33	40.99	41.76	38.6	10.49	10.02
	2	1	Média	108.9	1.15	1.235	1.25	0.63	0.6125	59.67	60.445	40.2325	39.56	39.87	39.9325	10.105	10.0025
	2	2	1	107.58	1.21	1.35	1.35	0.68	0.66	60.01	61.08	39.99	38.92	39.12	39.53	10.44	10.77
	2	2	2	108.34	1.14	1.27	1.27	0.633	0.63	60.79	61.92	39.21	38.08	38.03	39.96	11.38	10.97
	2	2	3	109.44	1.21	1.33	1.33	0.67	0.65	59.03	60.94	40.97	39.06	39.13	40.84	9.94	10.05
	2	2	4	110.02	1.23	1.35	1.34	0.67	0.67	60.78	61.32	39.22	38.68	38.76	39.3	11.01	11.01
	2	2	Média	108.845	1.1975	1.325	1.3225	0.66325	0.6525	60.1525	61.315	39.8475	38.685	38.76	39.9075	10.6925	10.7
	3	1	1	115.8	1.2	1.25	1.19	0.62	0.61	60.11	60.53	38.36	39.57	38.74	39.18	9.92	10.62
	3	1	2	112.8	1.2	1.29	1.28	0.65	0.64	59.7	57.87	39.74	40.26	40.49	39.51	9.23	10.21
	3	1	3	117.6	1.2	1.23	1.28	0.62	0.63	60.69	58.67	38.82	41.33	41.57	38.6	10.1	9.75
	3	1	4			1.35		0	0.1	51.14		40.34				7.2
	3	1	Média	115.4	1.2	1.28	1.25	0.47	0.47	57.91	59.02	39.32	40.39	40.27	39.1	9.11	10.19
	3	2	1	115.29	1.2	1.26	1.26	0.64	0.61	57.48	60.94	42.52	39.06	38.98	42.72	9.25	9.1
	3	2	2	116.24	1.51	1.56	1.56	0.79	0.76	59.37	61.85	40.63	38.15	38.14	41.49	10.6	10.18
	3	2	3	115.3	1.21	1.26	1.27	0.64	0.61	57.51	61.9	42.49	38.1	38.81	42.37	9.35	9.76
	3	2	4	116.95	1.07	1.11	1.12	0.57	0.54	57.66	61.29	42.34	38.71	38.89	42.05	9.38	9.6
	3	2	Média	115.945	1.2475	1.2975	1.3025	0.66	0.63	58.005	61.495	41.995	38.505	38.705	42.1575	9.645	9.66
	4	1	1
	4	1	2
	4	1	3	143.4	1.8	1.53	1.55	0.79	0.75	62.32	58.05	64.35	41.39	64.06	41.57	12.46	8.52
	4	1	4
	4	1	Média
	4	2	1	112.92	1.45	1.55	1.55	0.77	0.77	57.8	61.08	42.2	38.92	39.28	42.42	9.25	9.33
	4	2	2	114.3	1.54	1.62	1.66	0.81	0.82	58.24	61.62	41.76	38.38	39.39	42.23	9.42	9.69
	4	2	3	114.83	1.5	1.57	1.57	0.78	0.78	59.41	60.45	40.59	39.55	40.56	40.35	9.42	10.05
	4	2	4	115.13	1.4	1.51	1.54	0.78	0.73	59.11	62.5	40.89	37.5	38.43	42.16	10.34	10.17
	4	2	Média	114.295	1.4725	1.5625	1.58	0.785	0.775	58.64	61.4125	41.36	38.5875	39.415	41.79	9.6075	9.81
	5	1	1
	5	1	2
	5	1	3
	5	1	4	114.6	1.3	1.33	1.34	0.66	0.68	61.06	60.95	37.69	37.9	38.27	37.33	11.63	11.62
	5	1	Média
	5	2	1	120.39	1.53	1.59	1.54	0.81	0.75	61.13	64.28	38.87	35.72	35.93	40.4	12.6	11.94
	5	2	2
	5	2	3	125.07	1.6	1.56	1.58	0.75	0.81	60.91	63.01	39.09	36.99	37.85	39.05	11.53	11.98
	5	2	4	116.73	1.36	1.44	1.43	0.68	0.74	64.59	62.99	35.41	37.01	38.18	36.34	13.2	13.33
	5	2	Média	120.73	1.49667	1.53	1.51667	0.746667	0.766667	62.21	63.4267	37.79	36.5733	37.32	38.5967	12.4433	12.4167
	6	1	1	105	1.2	1.33	1.34	0.64	0.69	60.92	59.77	38.74	43.55	41.47	40.68	10.49	10.57
	6	1	2
	6	1	3	105.6	1.2	1.31	1.33	0.65	0.67	60.41	59.42	39.15	40.67	40.74	39.08	10.41	9.86
	6	1	4	102	1.1	1.3	1.29	0.01	0.02	60.29	60.65	39.46	39.86	39.8	39.52	10.8	10.39
	6	1	Média	104.2	1.1	1.31	1.32	0.43	0.46	60.54	59.95	39.12	41.36	40.67	39.76	10.57	10.27
	6	2	1	100.88	1.21	1.45	1.45	0.72	0.73	62.68	61.87	37.32	38.13	38.14	37.31	12.27	12.28
	6	2	2	103.17	1.15	1.35	1.35	0.65	0.69	63.62	61.68	36.38	38.32	38.41	36.35	12.6	12.66
	6	2	3	104.68	1.24	1.44	1.44	0.72	0.71	62.69	61.57	37.31	38.43	37.63	37.87	12.53	11.85
	6	2	4	101.82	1.11	1.32	1.31	0.64	0.66	61.78	60.61	38.22	39.39	36.34	38.18	11.07	11.21
	6	2	Média	102.638	1.1775	1.39	1.3875	0.6825	0.6975	62.6925	61.4325	37.3075	38.5675	37.63	37.4275	12.1175	12
	7	1	1	105.6	1.1	1.22	1.25	0.6	0.63	48.95	56.69		43.31	43.16		11.05	95.07
	7	1	2	117	1.3	1.3	1.29	0.66	0.64	51.38	45.85	42.04	45.95	46.76	41.31	4.52	8.3
	7	1	3	120.6	1.3	1.27	1.26	0.62	0.64	56.91	59.68	38.68	39.72	39.48	38.91	10.32	10.69
	7	1	6	121.2	1.3	1.25	1.27	0.61	0.65	62.27	61.21	38.83	38.99	38.83	38.99	11.27	11.11
	7	1	Média	119.6	1.3	1.27	1.27	0.63	0.64	56.85	55.58	39.85	41.55	41.69	39.74	8.7	10.03
	7	2	1	115.2	1.27	1.32	1.32	0.66	0.65	62.2	62.77	37.8	37.23	37.03	37.86	12.59	12.46
	7	2	2	119.03	1.33	1.35	1.35	0.67	0.72	60.48	60.96	39.52	39.04	38.97	38.31	10.75	11.32
	7	2	3	119.63	1.54	1.58	1.49	0.82	0.71	61.88	60.96	38.12	39.04	39.06	37.98	11.41	11.49
	7	2	4	120.19	1.27	1.27	1.27	0.61	0.65	62.01	60.66	37.99	39.34	39	37.16	11.5	11.75
	7	2	Média	118.513	1.3525	1.38	1.3575	0.69	0.6825	61.6425	61.3375	38.3575	38.6625	38.515	37.8275	11.5625	11.755
	8	1	1	105.6	1.1	1.23	1.24	0.59	0.64	61.06	58.07	38.58	41.23	41.59	38.25	10.71	8.77
	8	1	2	108.6	1.2	1.26	1.32	0.61	0.68	61.29	60.61	39.34	39.03	39.53	38.85	12.39	9.89
	8	1	3	106.8	1.2	1.37	1.37	0.65	0.72	59.22	59.84	40.07	38.46	38.12	40.43	10.99	9.75
	8	1	4	109.2	1.3	1.4	1.44	0.7	0.72	59.43	48.98	40.39	42.22	40.93	41.67	9.87	7.31
	8	1	Média	107.55	1.2	1.31	1.34	0.64	0.69	60.25	56.88	39.6	40.24	40.04	39.8	10.99	8.93
	8	2	1	106.87	1.14	1.29	1.27	0.63	0.64	60.69	59.53	39.31	40.47	40.04	39.42	10.32	10.05
	8	2	2	106.48	1.28	1.45	1.45	0.72	0.73	61.34	61.18	38.66	38.82	38.79	38.84	11.28	11.17
	8	2	3	107.34	1.28	1.43	1.44	0.71	0.71	60.56	58.86	39.44	41.14	40.64	39.36	9.96	9.75
	8	2	4	106.85	1.3	1.46	1.46	0.73	0.72	60.64	59.94	39.36	40.06	39.67	39.52	10.48	10.21
	8	2	Média	106.885	1.25	1.4075	1.405	0.6975	0.7	60.8075	59.8775	39.1925	40.1225	39.785	39.285	10.51	10.295

## Sheet: Column means
	Subject	Cadence (steps/min) 1	Cadence (steps/min) 2	Speed (m/s) 1	Speed (m/s) 2	R- Stride length (m) 1	R- Stride length (m) 2	L- Stride length (m) 1	L- Stride length (m) 2	R- Step length (m) 1	R- Step length (m) 2	L- Step length (m) 2	L- Step length (m) 2	R- Stance time (%) 1	R- Stance time (%) 2	L- Stance time (%) 1	L- Stance time (%) 2	R- Swing time (%) 1	R- Swing time (%) 2	L- Swing time (%) 1	L- Swing time (%) 2	R- Single support time (%) 1	R- Single support time (%) 2	L- Single support time (%) 1	L- Single support time (%) 2	R- Double support time (%) 1	R- Double support time (%) 2	L- Double support time (%) 1	L- Double support time (%) 2	R- Pelvic tilt (°) 1	R- Pelvic tilt (°) 2	L- Pelvic tilt (°) 1	L- Pelvic tilt (°) 2	R- Pelvic obliquity (°) 1	R- Pelvic obliquity (°) 2	L- Pelvic obliquity (°) 1	L- Pelvic obliquity (°) 2	R- Pelvic rotation (°) 1	R- Pelvic rotation (°) 2	L- Pelvic rotation (°) 1	L- Pelvic rotation (°) 2
	1	115.35	114.9	1.3	1.3	1.3	1.4	1.3	1.3	0.6	0.7	0.6	0.6	59.1	62.9	54.1	64.7	38.8	37	40.7	35.2	40.2	35.2	39.3	37.4	10.5	13.8	11.43	13.6	4.72	6.4	4.9	6	7.6	9.7	6.8	9.3	14	14.9	12.2	14.3
	2	89.1	86.37	0.7	0.7	1	1	1	1.1	0.5	0.5	0.5	0.58	62.9	63.05	68	63.66	37.7	39.91	33.4	36.33	37.8	36.26	33.2	36.83	19.1	13.4	12.2	13.41	3.575	3.35	3.675	3.12	2.45	6.3	2.5	6	9.2	8.12	8.4	7.67
	3	104.7	105.44	1.1	1.3	1.2	1.52	1.2	1.49	0.6	0.83	0.6	0.67	63.4	51.98	65.9	61.49	31.7	48.01	37.9	38.5	34.5	38.29	34.9	47.64	10.8	6.84	24.1	6.92	6.225	7.1	5	7.1	8.65	4.3	6.775	4.55	7.75	7.9	7.25	8.37
	4	119.7	119.41	1.4	1.34	1.4	1.35	1.4	1.35	0.7	0.65	0.7	0.68	63.7	59.81	62.1	59.58	36.3	40.18	38.2	40.41	38.4	40.71	36.1	40.37	13.3	9.54	12.2	9.6	5.35	10.07	5.225	10.1	6.325	9.85	6.375	9.67	9	17.75	8.45	17.67
	5	116.4	115.53	1.3	1.28	1.3	1.32	1.3	1.32	0.7	0.69	0.6	0.62	624.4	59.84	62.4	60.03	36.3	40.15	38.8	39.96	38.8	39.7	36.4	40.27	12.2	10.07	11.3	9.87	3.35	5.5	3.65	6.02	8.8	8.25	8.25	8.7	10.325	11.85	10.725	12.92
	6	109.8	105.64	1.2	1.17	1.3	1.34	1.3	1.33	0.7	0.64	0.7	0.66	63.1	59.43	57.7	57.44	39.9	40.57	45.2	43.06	45	43.11	40.1	40.08	11	8.15	6.8	8.43	2.47	4.72	3.15	4.62	2.675	6.07	2.775	6.02	8.425	7.1	9.2	6.62
	7	119.1	121.99	1.2	1.25	1.2	1.27	1.3	1.25	0.6	0.69	0.6	0.56	62.6	58.62	65.3	62.98	39.3	41.37	38.3	37.01	37.9	36.89	39.8	41.57	12.2	10.86	12.1	10.7	4.22	5.15	3.475	4.75	7.925	9.85	7.625	8.57	7.65	12.2	8.175	11.4
	8	121.2	118.015	1.4	1.3275	1.4	1.35	1.3	1.35	0.7	0.67	0.7	0.665	60.4	59.4575	63.2	59.57	37.4	40.5425	38.7	40.43	37.2	40.4225	38.9	40.66	10.8	9.515	10.9	9.4575	3.92	9.825	4.65	9.65	8.65	11.4	7.225	11.275	8.875	4.575	7.325	4.6
	9	126.6	119.91	1.3	1.3425	1.3	1.3525	1.2	1.3475	0.6	0.655	0.6	0.675	62.3	58.465	62.9	58.5	38.7	41.535	38.8	41.5	39.3	41.61	38.2	41.6225	12.2	8.4275	11.3	8.44	3.9	5.875	4.8	6.175	4.625	5.975	5.375	6.275	6.275	10.1	6.275	10.325
	10	106.2	105.355	0.9	0.8775	1	1.005	1	1.005	0.5	0.51	0.5	0.485	68.3	60.435	60.4	63.6825	35.7	39.565	40.6	36.3175	42.8	36.525	33.9	39.605	12.9	11.95	14.7	12.0375	2.92	3.45	3.575	3.525	4.625	3.625	4.725	3.625	9.15	7.375	9.425	7.125
	11	111.6	113	1.1	1.0975	1.1	1.165	1.1	1.1675	0.6	0.58	0.6	0.5775	63.9	58.0675	63.8	58.3975	35.9	41.9325	36.3	41.6025	36.3	41.4525	35.9	42.0675	14.1	8.31	13.7	8.1625	3.65	4.425	3.125	4.3	10.4	10.175	10.425	10.175	10.35	9.5	9.35	9.275
	12	116.85	112.847	1.3	1.36	1.4	1.4475	1.3	1.45	0.7	0.71	0.7	0.72	60.7	58.455	58.7	58.6575	39.4	41.545	39.4	41.3425	39	41.09	39.8	41.75	10.5	8.6825	10.8	8.4475	3.8	3.7	4.5	3.825	7.1	8.15	6.925	8.075	6.775	5.95	7.6	6.075
	13	116.4	118.165	1.3	1.2875	1.3	1.3275	1.3	1.3375	0.7	0.6175	0.7	0.705	61.2	63.63	63.9	61.965	39.4	36.37	35.3	38.035	35.9	38.4025	38.7	36.19	13.2	12.6125	12.7	12.885	5.8	6.25	5.7	5.475	3.96	9.725	4.4	9.05	7.13	7.45	7.26	7.025
	14	100.5	98.845	1.2	1.1675	1.4	1.4225	1.4	1.42	0.7	0.6975	0.7	0.7125	63.9	58.325	63.9	56.855	35.2	41.675	35.6	43.145	35.2	42.91	35.6	41.835	14.8	7.705	13.6	7.5075	3.9	5.925	4.525	6.05	5.925	8.825	4.525	8.725	5.85	7.375	4.075	7.825
	15	110.1	110.835	1.1	1.135	1.1	1.2375	1.2	1.235	0.6	0.6125	0.5	0.6175	64.2	58.3525	56.2	57.8025	37.1	41.6475	35.2	42.1975	36.1	42.5525	36.2	41.795	6.9	7.895	13.3	7.98	4.62	4	4.325	4.125	4.05	9.6	4.4	9.65	7.825	7.175	5.4	6.95
	16	119.1	118.727	1.2	1.2	1.2	1.2125	1.2	1.2175	0.6	0.6075	0.6	0.6	62.5	62.045	62.7	61.94	37.5	37.955	38.1	38.06	38.3	38.025	37.3	37.335	12.2	12.005	12.2	12.05	3.82	3.9	3.45	3.9	6.525	8.275	7.45	8.3	4.525	5.85	6.3	5.425
	17	109.2	112.953	1.1	1.2075	1.2	1.2925	1.2	1.2875	0.6	0.63	0.6	0.6475	60.6	62.8275	59	63.3375	35.4	37.1725	38.1	36.6625	35.5	36.5775	38	37.075	11.4	13.1225	11	13.13	6.63	7	6.23	7.125	3.96	9.025	2.93	9	7.33	4.975	8.6	5.1
	18	89.4	91.9675	0.8	0.875	1.1	1.145	1	1.145	0.5	0.5625	0.5	0.5625	59.2	60.3825	63.5	61.9	37.2	39.6175	39.1	38.1	39.3	38.265	36.9	39.2425	14.7	11.0525	5.2	11.325	4.67	4.2	3.775	3.925	5.975	7.175	5.875	7.075	12.425	6.4	12.875	6.35
	19	124.5	125.23	1.3	1.385	1.3	1.3325	1.3	1.3275	0.6	0.6825	0.6	0.63	61.4	58.6875	59.6	60.3625	39.2	41.3125	39.9	39.6375	40.5	39.5525	38.7	41.685	10.4	9.5675	11.1	9.3375	4.56	6.025	4.6	6.15	8.03	9.55	7.63	9.625	10.16	9.3	6.83	9.175
	20	111.6	108.998	1.225	1.2625	1.3175	1.3925	1.3	1.39	0.62	0.68	0.6875	0.69	60.705	57.6925	61.125	57.09	40.645	42.3075	40.9575	42.91	40.365	42.8625	41.2525	42.22	10.0375	7.415	10.1675	7.435	4.06	5.8	4.96	5.6	7.03	8.025	7	7.825	5.8	8.425	9.93	8.05
	21	111.3	113.422	1.1	1.1525	1.2	1.225	1.2	1.225	0.6	0.6	0.6	0.605	59.9	57.97	58.4	57.39	39.9	42.03	37.6	42.61	38	42.585	39.4	42.365	11.8	8.8875	10.5	8.795	5.87	11.175	6.025	11.275	6.95	8	7.275	8.025	6.975	5.025	6.2	4.85
	22	111.3	109.833	1.1	1.1025	1.2	1.21	1.2	1.2225	0.6	0.605	0.6	0.5775	65.5	59.4025	62.6	59.605	36.4	40.5975	38.2	40.395	39.3	40.7275	35.4	40.0325	14.5	9.335	12.8	9.5325	1.67	4.525	1.675	4.15	6.025	8.975	5.925	8.475	8.15	5.075	6.55	4.575
	23	113.4	113.79	1.3	1.4525	1.4	1.535	1.4	1.5275	0.7	0.7475	0.7	0.76	60.6	60.1475	59.7	59.8925	39.6	39.8525	41.4	40.1075	40.8	39.7925	40.2	39.2025	9.8	10.175	10.3	10.3425	3.32	5.6	3.25	5.725	3.7	5.925	3.725	6.025	5.625	7.2	7.65	6.1
	24	118.05	114.525	1.2	1.255	1.3	1.325	1.3	1.3275	0.6	0.6425	0.6	0.6575	60.5	57.7675	62.1	57.2325	39.4	42.2325	36.4	42.7675	36.3	42.9575	39.4	42.5575	12.8	7.3975	11.3	7.335	3.65	11	4.15	10.75	9.95	10.825	8.3	10.65	7.425	6.35	9.55	6.1
	25	116.1	111.31	1.1	1.0775	1.2	1.175	1.2	1.1675	0.6	0.585	0.6	0.57	62.8	58.7625	64.5	59.625	35.8	41.2375	37.4	40.375	36.5	40.2775	36.7	41.355	13.5	9.2425	11.9	9.1325	3.15	4.4	3.35	4.325	4.675	5.575	5.225	5.7	8.475	6.8	9.825	6.7
	26	112.5	113.637	1.3	1.3725	1.5	1.455	1.4	1.4575	0.7	0.705	0.7	0.7275	56.6	59.5	56.1	58.3425	37.7	40.5	37.4	41.6575	35.6	41.7475	39.6	40.7825	10.4	8.8725	8.6	8.7775	4.55	5.55	4.525	5.65	6.275	6.75	5.475	6.925	7.425	3.45	9.175	3.25
	27	100.05	103.155	1	1.06	1.2	1.24	1.2	1.24	0.6	0.62	0.6	0.6	62.4	57.5575	61.9	58.655	35.7	42.4425	34.6	41.345	34.2	41.5225	36.1	42.755	13.6	8.015	14.1	7.9475	3.66	5.7	3.76	5.775	2.46	5.95	1.23	5.825	5.63	7.45	5.43	7.35
	28	118.5	115.448	1.3	1.3725	1.3	1.42	1.4	1.43	0.7	0.6825	0.7	0.72	61.4	61.7025	61.2	59.165	38	38.2975	38.9	40.835	38.7	40.6075	38.3	38.1325	11.7	10.54	11.4	10.515	4.65	3.85	3.9	3.75	9.725	12.6	9.275	12.475	10.65	10.725	9.675	10.725
	29	99.75	100.355	1	1.065	1.2	1.28	1.2	1.2825	0.6	0.65	0.6	0.6075	63.3	56.76	61.8	61.1625	38.4	43.24	37.5	38.8375	38.7	39.045	37.2	43.0475	12.9	8.855	12.9	9.055	4.52	4.175	3.95	4.15	7.075	9.65	7.025	9.375	12.325	8.1	10.475	7.575
	30	126.9	126.84	1.3	1.3025	1.2	1.25	1.2	1.2625	0.6	0.67	0.6	16.9	62.8	57.5925	62.8	63.8575	38.3	40.3675	38.8	38.2675	39.7	36.4675	37.4	42.81	12.2	10.565	11.9	8.0225	4.05	6.525	4.225	5.85	5.875	8.95	5.675	8.65	6.425	3.9	5.55	4.025
	31	114.6	115.98	1.1	1.135	1.2	1.185	1.2	1.1825	0.6	0.605	0.6	0.5575	62.5	57.555	63.8	59.1325	37.7	42.445	35.8	40.8675	36	40.97	37.4	42.375	12.7	8.29	13.4	8.375	6.22	11.975	5.925	11.15	6.175	8.3	6.7	8.05	7.325	7.825	6.35	7.85
	32	139.65	136.365	1.3	1.2175	1.1	1.0925	1.1	1.0825	0.5	0.5475	0.5	0.5225	61.4	61.8	61.6	62.9775	39.4	38.2	38.8	37.0225	38.9	37.48	39.3	38.7725	11.9	12.1575	10.4	12.1025	4.65	5.525	3.9	5.425	3.75	9.45	3.225	9.425	5.025	2.05	4.975	2.2
	33	123.15	127.105	1.4	1.3925	1.4	1.3625	1.3	1.335	0.7	0.65	0.7	0.675	61.9	62.4675	62.8	61.965	37.2	37.5325	36.7	38.035	36.7	38.835	37.2	38.19	12.7	11.815	12.6	11.8875	7.05	14.3	7.075	14.4	8.75	13.475	9.875	13.475	9.325	9.275	11.3	8.625
	34	129.75	131.15	1.4	1.35	1.3	1.2475	1.3	1.2475	0.6	0.5925	0.6	0.635	58.3	61.7625	56.7	59.535	42.3	38.2375	42.8	40.465	43.3	40.535	41.8	38.6275	7.5	10.61	8	10.45	2.42	5.975	3.35	6.2	9.725	11.15	9.575	10.725	12.775	7.175	10.475	7.275
	35	109.65	110.13	1.1	1.04	1.2	1.14	1.2	1.1475	0.6	0.56	0.6	0.56	62.8	62.3125	60.7	62.3075	37.8	37.6875	38.9	37.6925	39.8	38.345	37	37.835	11.7	11.98	12.2	12.2325	4.37	4.475	4.8	4.675	7.275	7.225	6.925	7.175	7.175	4.775	6.775	5.025
	36	117.45	117.685	1.3	1.2925	1.3	1.3275	1.3	1.32	0.6	0.65	0.7	0.6525	64.2	61.485	63.6	62.28	35	38.515	35.9	37.72	36	37.8825	34.9	38.3925	14.5	11.7975	14	11.94	4.85	5.4	5.925	5.575	5.925	7.225	6.325	7.475	9.125	10.525	8.7	10.325
	37	119.1	119.005	1.3	1.2875	1.3	1.3025	1.3	1.3	0.7	0.645	0.6	0.63	64.1	60.07	61.7	60.565	36	39.93	40.5	39.435	39.2	39.4175	37.1	39.995	13.1	10.3125	12.7	10.2825	4.55	4.525	5.1	4.575	6.85	8.775	6.375	8.65	8.25	6.75	8.1	6.7
	38	119.25	119.157	1.2	1.2725	1.3	1.29	1.2	1.29	0.6	0.6225	0.6	0.645	61.5	59.6	60.8	59.5575	39.6	40.4	35.1	40.4425	37	40.6275	37.5	40.535	11.9	9.4825	9.4	9.5075	3.72	5.4	4.75	5.45	8.225	10.275	8.9	10.4	8.125	5.325	8.45	5.55
	39	122.25	121.493	1.2	1.19	1.2	1.1875	1.2	1.1825	0.6	0.605	0.6	0.555	62	60.0125	62.5	61.97	37.9	39.9875	37.8	38.03	37.7	37.9025	38	40.3875	12.7	11.055	11.9	10.7875	3.32	6	4	5.75	8.275	11.075	8.4	10.05	8.5	8.65	8.975	8.25
	40	117.45	118.968	1.2	1.2475	1.3	1.265	1.2	1.2675	0.6	0.6375	0.6	0.61	59.2	60.5975	63.5	61.6225	39.7	39.4025	37	38.3775	36.4	38.2575	40.4	39.6525	11.3	11.17	12.4	10.9825	4.85	5.125	5.025	4.775	6.475	6.425	6.825	6.475	9.325	5.625	9.275	4.9
	41	109.05	114.16	1.2	1.215	1.3	1.29	1.3	1.28	0.7	0.6425	0.6	0.6275	65.2	60.9225	63.9	62.0025	35.4	39.0775	35.3	37.9975	35.7	38.08	34.9	39.0125	15.9	11.4225	14	11.49	4.67	7.475	4.625	7.175	5.325	7.05	6	6.85	9.175	8.625	8.6	7.775
	42	109.8	110.192	1.1	1.1075	1.2	1.21	1.2	1.2075	0.6	0.605	0.6	0.5825	63.3	61.1675	63.8	60.53	38	38.8325	35.5	39.47	36	39.5425	37.5	38.82	13.7	10.815	14.1	10.8525	3.47	4.1	4.4	3.975	4.55	7.1	4.25	7	8.85	10.725	11.525	10.7
	43	116.55	117.645	1.2	1.1475	1.2	1.1825	1.2	1.18	0.6	0.5675	0.6	0.5675	61.5	61.815	62.3	62.71	39.3	38.185	39.4	37.29	38.3	37.365	40.3	38.2075	10.9	12.2225	12.1	12.2475	4.92	5.4	5.4	4.9	2.675	9.85	3.25	9.3	12.775	9.975	11.375	9.525
	44	120.15	117.195	1.3	1.2325	1.3	1.265	1.3	1.2625	0.7	0.6275	0.6	0.615	60.7	61.7025	57.3	60.6825	39.4	38.2975	36.7	39.3175	37.8	39.43	38.2	38.0225	9	11.1325	8.9	11.33	3.75	5.1	3.775	5.025	8.825	11.7	9.975	11.35	10.4	8.725	8.825	8.175
	45	121.95	120.715	1.3	1.3025	1.3	1.3	1.3	1.2975	0.6	0.6325	0.6	0.6425	59.8	61.0725	61.4	58.7425	36.5	38.9275	41.1	41.2575	39.5	41.04	37.9	38.905	8	10.0125	10.8	9.915	8.52	5.55	8.675	5.875	14.825	15.625	15.275	15.675	9.95	8	10.925	8.15
	46	133.35	132.095	1.2	1.215	1.1	1.1175	1.1	1.1175	0.5	0.5425	0.6	0.555	60.3	58.8825	66.3	57.61	37.3	41.1175	35	42.39	33.3	42.57	39.2	41.1925	13.1	8.1525	12.2	8.2075	6.52	9.8	5.7	9.65	2.725	9.875	2.45	9.85	17.675	4.025	18.225	3.95
	47	124.05	125.22	1.3	1.215	1.2	1.165	1.2	1.165	0.6	0.57	0.6	0.575	60.4	58.94	60.3	57.9325	41.6	41.06	39.3	42.0675	40.3	42.195	40.6	41.295	10.5	8.37	10.6	8.3175	4.45	4.95	4.4	4.625	3.725	6.65	3.5	6.375	8.95	8.1	8.325	8
	48	102.45	102.322	1	1.02	1.1	1.205	1.2	1.2	0.6	0.595	0.6	0.585	64.5	56.805	61.1	57.6125	36.3	43.195	40.9	42.3875	42.2	42.4725	35.1	43.26	12.1	7.1625	11.5	7.175	4.5	6.775	5.03	6.625	2.3	5.35	2.63	5.55	9.23	9.7	7.86	9.35
	49	124.95	124.515	1.275	1.2575	1.2	1.2175	1.2175	1.2125	0.625	0.5925	0.5925	0.6	58.335	57.205	59.7675	57.33	40.315	42.795	38.215	42.67	38.0925	42.7	40.4975	42.7225	10.6875	7.2525	10.6425	7.3025	2.73	4.85	3.43	4.9	4.23	6.075	4.6	6.125	7.53	7.25	7.56	7.675
	50	110.55	108.57	1	0.9875	1.1	1.0925	1.1	1.0925	0.6	0.525	0.5	0.5475	60.2	60.1825	67.1	59.5225	41.3	39.8175	33.1	40.4775	31.8	40.55	43	39.365	11.6	9.815	12	10.08	2.75	3.95	2.575	4.225	2.45	5.975	2.375	6.05	2.35	6	2.9	6
	51	130.05	134.543	1.4	1.3425	1.2	1.2175	1.3	1.2175	0.6	0.5925	0.6	0.605	61.8	62.3025	60.9	61.58	38.2	37.6975	39.3	38.42	39.7	38.4625	37.8	38.3925	11.2	11.915	11.5	11.5925	3.52	2.4	3.625	2.3	5.95	7.725	7.275	7.875	8.95	7.725	7.7	8.125
	52	120.45	120.345	1.2	1.1775	1.2	1.175	1.2	1.1825	0.6	0.59	0.6	0.5675	61.8	58.195	61.6	58.645	38.7	41.805	38	41.355	37.9	41.455	38.8	41.3975	12.6	8.3675	10.3	8.6225	4.22	7.75	4.275	7.225	8.75	10.85	8.775	10.575	6.075	6.8	4.625	6.675
	53	115.95	116.925	1.1	1.03	1.1	1.0725	1.1	1.06	0.6	0.5525	0.6	0.4975	66.7	57.4425	61.9	58.55	34.2	42.5575	39.7	41.45	40.6	41.125	33.4	42.1475	13	8.155	14	8.1975	4.25	7.5	3.15	8.5	7.325	7.875	6.2	8.625	8.9	12.525	7.675	13.575
	54	111	106.95	1.1	1.0775	1.2	1.2125	1.2	1.2225	0.6	0.5825	0.6	0.6175	63.1	61.4075	61.7	62.0575	36.4	38.5925	39.3	37.9425	38.3	37.9925	37.3	38.335	12.6	11.695	12.8	11.86	3.87	3.925	5.5	3.8	6.6	9.4	6.35	9.35	10.75	5.875	9.475	5.225
	55	113.7	113.562	1.3	1.3375	1.4	1.4275	1.4	1.4175	0.7	0.6875	0.7	0.7125	54.1	58.37	60	56.395	36.6	41.63	38.5	43.605	39.1	44.01	36.1	41.6875	11.3	7.175	12	7.355	4.5	6.25	4.6	6.45	7.575	6.775	7.95	7.325	4.825	6.3	3.825	6.325
	56	116.7	114.675	1.3	1.2975	1.3	1.3625	1.3	1.36	0.7	0.68	0.7	0.66	64.6	60.4875	64.4	59.04	37.8	39.5125	43	40.96	39.3	40.6075	41.4	39.8625	12.5	9.935	14.1	9.59	2.72	10.8	2.975	11.2	6.85	11	7.175	11.025	5.675	14.25	7.675	14.375
	57	117	115.248	1.3	1.305	1.4	1.365	1.3	1.3625	0.7	0.6675	0.7	0.68	57.8	58.9	57.9	57.66	38.4	41.1	40	42.34	39.6	42.565	38.8	41.075	10.3	8.1675	7.5	8.29	3.32	3.925	2.95	3.875	6.3	6.775	6.05	6.825	7.175	9.55	6.6	9.8
	58	113.55	110.567	1.3	1.3025	1.4	1.4225	1.3	1.4125	0.7	0.7	0.7	0.7025	60.8	59.035	59.3	58.535	39.5	40.965	40.2	41.465	41.1	41.5125	38.6	40.9625	10.4	8.7575	9.4	8.785	4.96	6.275	4.83	6.625	7.8	13.475	6.23	13.4	10.76	10.5	9.06	10.15
	59	97.5	94.0525	1.2	1.1725	1.5	1.495	1.4	1.5	0.7	0.7375	0.7	0.74	62.2	56.055	64.8	58.065	39	43.945	38.6	41.935	36.1	42.0825	41.7	42.9825	12.7	6.985	12.9	7.5375	3.75	6.425	3.575	6.4	5.225	9.05	4.925	9.075	5.175	5.9	5.4	5.625

## Sheet: Trials
	Subject	Cadence 1.1	Cadence 1.2	Cadence 1.3	Cadence 1.4	Cadence 2.1	Cadence 2.2	Cadence 2.3	Cadence 2.4	Speed 1.1	Speed 1.2	Speed 1.3	Speed 1.4	Speed 2.1	Speed 2.2	Speed 2.3	Speed 2.4	R- Stride length (m) 1.1	R- Stride length (m) 1.2	R- Stride length (m) 1.3	R- Stride length (m) 1.4	R- Stride length (m) 2.1	R- Stride length (m) 2.2	R- Stride length (m) 2.3	R- Stride length (m) 2.4	L- Stride length (m) 1.1	L- Stride length (m) 1.2	L- Stride length (m) 1.3	L- Stride length (m) 1.4	L- Stride length (m) 2.1	L- Stride length (m) 2.2	L- Stride length (m) 2.3	L- Stride length (m) 2.4	R- Step length (m) 1.1	R- Step length (m) 1.2	R- Step length (m) 1.3	R- Step length (m) 1.4	R- Step length (m) 2.1	R- Step length (m) 2.2	R- Step length (m) 2.3	R- Step length (m) 2.4	L- Step length (m) 1.1	L- Step length (m) 1.2	L- Step length (m) 1.3	L- Step length (m) 1.4	L- Step length (m) 2.1	L- Step length (m) 2.2	L- Step length (m) 2.3	L- Step length (m) 2.4
	1	114	112.2	125.4	109.8	111.1	114.63	122.55	111.66	1.3	1.4	1.4	1.1	1.3	1.44	1.44	1.07	1.43	1.5	1.39	1.17	1.44	1.55	1.41	1.17	1.38	1.46	1.37	1.18	1.39	1.53	1.44	1.17	0.71	0.75	0.69	0.58	0.75	0.82	0.73	0.62	0.69	0.73	0.69	0.6	0.66	0.71	0.68	0.55
	2	80.4	93	84.6	91.8	81.05	84.67	89.12	90.64	0.7	0.8	0.7	0.8	0.68	0.68	0.8	0.94	0.95	0.97	1.05	1.03	1.01	0.77	1.1	1.25	0.93	1	1.04	1.05	1.01	1.14	1.11	1.23	0.48	0.5	0.51	0.53	0.49	0.3	0.57	0.62	0.47	0.49	0.53	0.5	0.51	0.68	0.53	0.61
	3	106.8	99	99	114	105.94	102.27	102.46	111.1	1	1	1	1.1	1.26	1.24	1.26	1.46	1.18	1.22	1.26	1.2	1.46	1.5	1.54	1.59	1.14	1.23	1.24	1.22	1.44	1.48	1.49	1.57	0.6	0.59	0.61	0.61	0.82	0.85	0.85	0.81	0.56	0.63	0.63	0.6	0.63	0.63	0.66	0.76
	4	117.6	124.8	117	119.4	116.98	123.89	118.89	117.91	1.3	1.5	1.3	1.3	1.28	1.49	1.3	1.32	1.35	1.46	1.35	1.32	1.32	1.44	1.32	1.34	1.35	1.43	1.37	1.32	1.32	1.44	1.32	1.35	0.66	0.74	0.68	0.64	0.62	0.7	0.64	0.66	0.68	0.7	0.68	0.68	0.68	0.72	0.66	0.67
	5	112.2	111	121.8	120.6	111.45	115.04	119.97	115.67	1.2	1.2	1.3	1.4	1.22	1.26	1.33	1.33	1.25	1.29	1.32	1.37	1.32	1.32	1.32	1.35	1.3	1.32	1.27	1.33	1.32	1.32	1.34	1.31	0.64	0.65	0.67	0.72	0.67	0.67	0.65	0.79	0.63	0.66	0.63	0.63	0.64	0.64	0.67	0.53
	6	109.8	107.4	112.8	109.2	103.54	103.64	106.54	108.84	1.2	1.2	1.3	1.3	1.15	1.17	1.17	1.22	1.27	1.33	1.33	1.38	1.33	1.36	1.32	1.35	1.32	1.32	1.35	1.39	1.33	1.35	1.32	1.35	0.66	0.66	0.67	0.69	0.63	0.66	0.64	0.66	0.63	0.66	0.67	0.69	0.67	0.67	0.66	0.67
	7	124.8	117	113.4	121.2	125.21	122.11	121.44	119.22	1.3	1.2	1.2	1.3	1.27	1.26	1.25	1.24	1.24	1.24	1.26	1.24	1.27	1.28	1.26	1.27	1.26	1.24	1.24	1.26	1.25	1.25	1.26	1.27	0.64	0.6	0.61	0.64	0.71	0.69	0.68	0.68	0.62	0.64	0.64	0.6	0.55	0.57	0.56	0.58
	8	120.6	133.2	114.6	116.4	118.08	128.12	112.53	113.33	1.3	1.5	1.4	1.3	1.32	1.51	1.23	1.25	1.35	1.43	1.48	1.4	1.34	1.42	1.31	1.33	1.32	1.21	1.39	1.37	1.35	1.42	1.3	1.33	0.64	0.64	0.69	0.69	0.68	0.69	0.65	0.66	0.7	0.69	0.74	0.7	0.66	0.72	0.63	0.65
	9	118.8	127.2	123.6	136.8	118.07	118.74	119.9	122.93	1.2	1.3	1.3	1.4	1.23	1.39	1.4	1.35	1.23	1.24	1.3	1.29	1.27	1.41	1.41	1.32	1.24	1.24	1.27	1.23	1.25	1.41	1.41	1.32	0.62	0.65	0.65	0.68	0.63	0.69	0.66	0.64	0.62	0.59	0.64	0.58	0.61	0.7	0.73	0.66
	10	97.2	110.4	112.2	105	97.79	107.23	108.36	108.04	0.7	0.9	1	0.8	0.75	0.89	0.96	0.91	0.91	1	1.05	0.95	0.94	1	1.06	1.02	0.91	0.97	1.04	0.94	0.94	1	1.06	1.02	0.49	0.47	0.52	0.47	0.48	0.5	0.54	0.52	0.41	0.5	0.53	0.48	0.45	0.49	0.51	0.49
	11	114.6	116.4	103.2	112.2	113.91	119.18	107.78	111.13	1.1	1.2	1	1	1.09	1.22	1.04	1.04	1.2	1.2	1.15	1.04	1.15	1.23	1.16	1.12	1.18	1.18	1.17	1.01	1.15	1.24	1.16	1.12	0.58	0.59	0.56	0.51	0.58	0.61	0.57	0.56	0.61	0.6	0.6	0.5	0.56	0.62	0.58	0.55
	12	120	109.8	117.6	120	118.4	110.29	114.8	107.9	1.4	1.2	1.3	1.3	1.48	1.21	1.46	1.29	1.45	1.36	1.3	1.3	1.5	1.32	1.53	1.44	1.35	1.35	1.3	1.33	1.51	1.32	1.53	1.44	0.7	0.68	0.63	0.67	0.73	0.65	0.76	0.7	0.7	0.68	0.67	0.64	0.76	0.66	0.74	0.72
	13	114	115.8	116.4	119.4	114.59	116.47	119.82	121.78	1.3	1.3	1.3	1.4	1.26	1.27	1.3	1.32	1.31	1.33	1.39	1.36	1.34	1.33	1.32	1.32	1.32	1.3	1.39	1.36	1.34	1.33	1.34	1.34	0.66	0.68	0.72	0.7	0.66	0.61	0.62	0.58	0.65	0.64	0.67	0.66	0.67	0.71	0.7	0.74
	14	94.8	102	112.8	92.4	95.53	102.56	105.88	91.41	1	1.2	1.4	1	1.06	1.2	1.33	1.08	1.3	1.33	1.47	1.32	1.33	1.42	1.51	1.43	1.31	1.45	1.49	1.33	1.33	1.41	1.51	1.43	0.65	0.7	0.76	0.69	0.65	0.69	0.75	0.7	0.65	0.69	0.72	0.64	0.67	0.71	0.75	0.72
	15	108.6	110.4	110.4	111	106.44	111.38	112.41	113.11	0.9	1.1	1.2	1.1	1	1.15	1.23	1.16	0.94	1.19	1.25	1.14	1.13	1.25	1.32	1.25	1.03	1.16	1.26	1.21	1.13	1.25	1.32	1.24	0.45	0.61	0.68	0.63	0.55	0.62	0.66	0.62	0.49	0.56	0.58	0.54	0.57	0.62	0.66	0.62
	16	119.4	117	121.8	118.2	119.68	116.64	121.07	117.52	1.2	1.2	1.2	1.2	1.25	1.21	1.18	1.16	1.19	1.2	1.18	1.18	1.25	1.25	1.17	1.18	1.23	1.21	1.18	1.2	1.25	1.25	1.18	1.19	0.62	0.62	0.6	0.6	0.63	0.62	0.59	0.59	0.59	0.59	0.58	0.59	0.61	0.62	0.59	0.58
	17	99.6	111	112.8	113.4	111.24	111.58	113.95	115.04	1	1	1.1	1.2	1.24	1.15	1.17	1.27	1.15	1.16	1.21	1.22	1.35	1.24	1.25	1.33	1.17	1.09	1.21	1.26	1.34	1.24	1.24	1.33	0.59	0.6	0.62	0.61	0.64	0.61	0.62	0.65	0.57	0.53	0.59	0.63	0.68	0.62	0.62	0.67
	18	96	91.8	83.4	86.4	94.44	95.13	89.96	88.34	0.8	0.9	0.7	0.7	0.93	0.94	0.77	0.86	1.05	1.12	1.03	1.03	1.19	1.19	1.03	1.17	1.04	1.11	0.98	1	1.18	1.19	1.03	1.18	0.53	0.56	0.52	0.49	0.58	0.59	0.5	0.58	0.51	0.55	0.46	0.55	0.59	0.58	0.51	0.57
	19	121.2	120.6	129.6	126.6	121.54	122.5	128.36	128.52	1.3	1.2	1.3	1.4	1.33	1.28	1.41	1.52	1.22	1.19	1.28	1.32	1.32	1.26	1.32	1.43	1.29	1.23	1.2	1.3	1.32	1.25	1.32	1.42	0.63	0.59	0.62	0.66	0.68	0.64	0.67	0.74	0.63	0.62	0.62	0.65	0.62	0.6	0.63	0.67
	20	105.6	106.8	116.4	117.6	104.77	104.18	113.75	113.29	1.2	1.2	1.3	1.2	1.16	1.26	1.27	1.36	1.27	1.3	1.39	1.31	1.34	1.45	1.34	1.44	1.38	1.29	1.29	1.24	1.34	1.44	1.34	1.44	0.62	0.63	0.61	0.62	0.65	0.72	0.65	0.7	0.7	0.66	0.73	0.66	0.67	0.7	0.67	0.72
	21	100.2	115.8	115.8	113.4	106.59	115.55	116.67	114.88	1	1.2	1.2	1.1	1.1	1.19	1.2	1.12	1.15	1.19	1.17	1.2	1.25	1.24	1.24	1.17	1.19	1.24	1.23	1.22	1.24	1.25	1.24	1.17	0.56	0.6	0.6	0.61	0.63	0.6	0.6	0.57	0.61	0.62	0.6	0.6	0.6	0.62	0.62	0.58
	22	106.2	111	108	120	104.27	107.6	108.37	119.09	1	1.1	1.1	1.2	1.01	1.04	1.2	1.16	1.1	1.18	1.22	1.23	1.17	1.17	1.33	1.17	1.11	1.18	1.27	1.25	1.17	1.19	1.33	1.2	0.55	0.61	0.65	0.63	0.57	0.6	0.66	0.59	0.55	0.56	0.59	0.61	0.58	0.55	0.65	0.53
	23	118.2	109.8	112.8	112.8	118.54	111.82	110.84	113.96	1.4	1.3	1.3	1.3	1.53	1.45	1.46	1.37	1.38	1.39	1.42	1.44	1.57	1.55	1.58	1.44	1.43	1.38	1.4	1.39	1.56	1.55	1.55	1.45	0.69	0.7	0.69	0.69	0.75	0.75	0.77	0.72	0.72	0.69	0.72	0.72	0.79	0.77	0.77	0.71
	24	120.6	120.6	115.2	115.8	117.93	114.82	113.18	112.17	1.3	1.3	1.2	1.2	1.28	1.27	1.23	1.24	1.25	1.27	1.25	1.26	1.31	1.33	1.32	1.34	1.24	1.24	1.3	1.32	1.32	1.34	1.31	1.34	0.65	0.62	0.62	0.64	0.66	0.66	0.63	0.62	0.6	0.64	0.65	0.65	0.63	0.65	0.66	0.69
	25	112.2	111	120	121.2	108.89	108.34	113.24	114.77	1.1	1.1	1.2	1.2	0.99	0.98	1.17	1.17	1.14	1.2	1.16	1.24	1.1	1.11	1.25	1.24	1.17	1.14	1.15	1.22	1.1	1.1	1.24	1.23	0.56	0.57	0.57	0.61	0.56	0.53	0.63	0.62	0.6	0.6	0.58	0.62	0.52	0.56	0.6	0.6
	26	99.6	112.2	117	121.2	103.93	115.13	117.1	118.39	1.1	1.4	1.4	1.5	1.08	1.45	1.47	1.49	1.37	1.46	1.48	1.49	1.25	1.52	1.52	1.53	1.32	1.51	1.41	1.43	1.25	1.54	1.52	1.52	0.68	0.7	0.71	0.72	0.61	0.71	0.77	0.73	0.67	0.78	0.74	0.74	0.62	0.8	0.72	0.77
	27	101.4	105.6	92.4	100.8	106.72	107.03	94.96	103.91	1	1.1	0.9	1	1.1	1.15	0.93	1.06	1.18	1.09	1.12	1.26	1.25	1.31	1.17	1.23	1.14	1.31	1.15	1.19	1.25	1.3	1.18	1.23	0.56	0.57	0.55	0.58	0.63	0.66	0.57	0.62	0.6	0.63	0.59	0.64	0.6	0.62	0.59	0.59
	28	120	118.2	118.2	117.6	116.93	115.17	115.64	114.05	1.4	1.3	1.3	1.3	1.39	1.36	1.38	1.36	1.36	1.29	1.31	1.3	1.42	1.42	1.42	1.42	1.37	1.34	1.31	1.38	1.43	1.42	1.44	1.43	0.66	0.64	0.67	0.66	0.68	0.68	0.71	0.66	0.7	0.67	0.64	0.67	0.72	0.72	0.7	0.74
	29	100.2	103.2	97.2	98.4	102.28	101.99	99.72	97.43	1	1.1	1	1	0.98	1.12	1.09	1.07	1.22	1.27	1.15	1.23	1.15	1.33	1.31	1.33	1.16	1.24	1.2	1.16	1.17	1.31	1.32	1.33	0.61	0.66	0.59	0.63	0.58	0.67	0.65	0.7	0.58	0.59	0.59	0.57	0.56	0.62	0.64	0.61
	30	136.2	126	130.2	115.2	135.27	121.48	129.57	121.04	1.4	1.3	1.4	1.1	1.46	1.19	1.4	1.16	1.23	1.16	1.25	1.16	1.31	1.19	1.32	1.18	1.26	1.17	1.26	1.19	1.35	1.19	1.34	1.17	0.65	0.64	0.67	0.6	0.65	0.63	0.76	0.64	0.6	0.53	0.58	0.57	66	0.54	0.55	0.51
	31	110.4	111.6	116.4	120	111.87	114.81	117.69	119.55	1.1	1.1	1.1	1.2	1.1	1.12	1.15	1.17	1.17	1.19	1.16	1.19	1.19	1.18	1.19	1.18	1.18	1.18	1.17	1.2	1.18	1.2	1.18	1.17	0.6	0.61	0.57	0.62	0.61	0.61	0.6	0.6	0.58	0.58	0.59	0.58	0.55	0.56	0.56	0.56
	32	135.6	132	139.2	151.8	137.69	131.75	135.95	140.07	1.3	1.1	1.2	1.5	1.32	1.08	1.16	1.31	1.11	1.03	1.06	1.14	1.18	1.01	1.04	1.14	1.13	1.02	1.08	1.13	1.17	0.99	1.03	1.14	0.55	0.53	0.54	0.56	0.56	0.53	0.55	0.55	0.57	0.5	0.51	0.57	0.59	0.46	0.47	0.57
	33	113.4	129.6	121.8	127.8	114.55	145.84	120.52	127.51	1.2	1.5	1.4	1.5	1.27	1.51	1.27	1.52	1.23	1.41	1.39	1.38	1.36	1.38	1.27	1.44	1.27	1.37	1.36	1.39	1.34	1.31	1.26	1.43	0.66	0.69	0.68	0.69	0.61	0.7	0.6	0.69	0.59	0.7	0.7	0.7	0.72	0.62	0.64	0.72
	34	124.2	135.6	134.4	124.8	125.78	136.53	136.16	126.13	1.3	1.5	1.5	1.2	1.28	1.31	1.52	1.29	1.24	1.31	1.32	1.18	1.24	1.17	1.34	1.24	1.28	1.29	1.32	1.21	1.25	1.15	1.35	1.24	0.65	0.65	0.66	0.61	0.58	0.58	0.64	0.57	0.61	0.65	0.66	0.59	0.65	0.56	0.68	0.65
	35	106.8	108	112.2	111.6	107.87	110.54	109.57	112.54	1	1.1	1.1	1.1	0.99	1.06	1.07	1.04	1.13	1.17	1.2	1.1	1.1	1.16	1.18	1.12	1.11	1.17	1.22	1.22	1.11	1.17	1.18	1.13	0.56	0.58	0.63	0.6	0.52	0.6	0.59	0.53	0.56	0.59	0.58	0.56	0.56	0.54	0.57	0.57
	36	114	117.6	120.6	117.6	116.02	117.26	118.89	118.57	1.2	1.2	1.3	1.3	1.28	1.28	1.31	1.3	1.28	1.28	1.33	1.28	1.33	1.32	1.33	1.33	1.27	1.26	1.32	1.31	1.33	1.31	1.32	1.32	0.62	0.62	0.65	0.63	0.65	0.64	0.66	0.65	0.66	0.65	0.67	0.66	0.66	0.65	0.64	0.66
	37	117	120.6	119.4	119.4	115.44	119.09	121.6	119.89	1.2	1.3	1.3	1.3	1.19	1.32	1.32	1.32	1.27	1.3	1.29	1.32	1.24	1.33	1.31	1.33	1.26	1.31	1.32	1.3	1.24	1.33	1.31	1.32	0.63	0.65	0.67	0.65	0.6	0.66	0.66	0.66	0.64	0.65	0.64	0.65	0.62	0.64	0.62	0.64
	38	100.2	128.4	123.6	124.8	103.18	125.5	123.59	124.36	1	1.3	1.3	1.4	1.06	1.3	1.36	1.37	1.2	1.3	1.24	1.32	1.26	1.25	1.33	1.32	1.14	1.21	1.27	1.29	1.25	1.25	1.33	1.33	0.56	0.62	0.59	0.66	0.63	0.6	0.63	0.63	0.61	0.63	0.66	0.65	0.61	0.63	0.67	0.67
	39	124.2	120	123.6	121.2	123.39	118.81	121.62	122.15	1.2	1.2	1.2	1.2	1.17	1.22	1.19	1.18	1.2	1.2	1.19	1.17	1.16	1.24	1.18	1.17	1.2	1.19	1.17	1.19	1.15	1.23	1.18	1.17	0.61	0.59	0.58	0.57	0.61	0.6	0.61	0.6	0.59	0.6	0.6	0.61	0.52	0.61	0.55	0.54
	40	119.4	112.8	119.4	118.2	123.41	116.8	110.28	125.38	1.3	1.1	1.2	1.2	1.28	1.21	1.21	1.29	1.35	1.21	1.21	1.24	1.24	1.25	1.33	1.24	1.24	1.15	1.15	1.24	1.24	1.25	1.33	1.25	0.69	0.63	0.63	0.64	0.63	0.63	0.69	0.6	0.6	0.55	0.55	0.6	0.59	0.6	0.63	0.62
	41	110.4	108	106.2	111.6	112.14	112.35	109.75	122.4	1.2	1.1	1.1	1.2	1.18	1.26	1.16	1.26	1.29	1.25	1.24	1.24	1.28	1.36	1.27	1.25	1.31	1.3	1.25	1.28	1.26	1.33	1.28	1.25	0.65	0.68	0.63	0.65	0.62	0.7	0.64	0.61	0.65	0.6	0.61	0.61	0.61	0.66	0.62	0.62
	42	107.4	112.2	109.8	109.8	109.53	112.48	108.93	109.83	1.1	1.2	1.1	1.1	1.06	1.18	1.06	1.13	1.17	1.26	1.2	1.19	1.17	1.26	1.17	1.24	1.18	1.24	1.18	1.23	1.16	1.26	1.17	1.24	0.59	0.62	0.59	0.61	0.59	0.63	0.58	0.62	0.59	0.64	0.6	0.6	0.55	0.61	0.57	0.6
	43	113.4	116.4	116.4	120	116.75	118.73	117.58	117.52	1.1	1.2	1.2	1.2	1.12	1.16	1.15	1.16	1.17	1.17	1.21	1.18	1.17	1.18	1.19	1.19	1.18	1.23	1.21	1.19	1.17	1.18	1.18	1.19	0.61	0.62	0.62	0.59	0.54	0.59	0.61	0.53	0.57	0.58	0.59	0.6	0.6	0.57	0.55	0.55
	44	115.2	126.6	120.6	118.2	115.76	115.63	120.18	117.21	1.2	1.4	1.3	1.3	1.13	1.28	1.32	1.2	1.21	1.31	1.35	1.27	1.17	1.33	1.33	1.23	1.33	1.34	1.32	1.3	1.17	1.33	1.32	1.23	0.62	0.67	0.68	0.66	0.58	0.65	0.67	0.61	0.64	0.65	0.65	0.62	0.57	0.66	0.63	0.6
	45	116.4	123	124.2	124.2	114.13	121.88	123.03	123.82	1.2	1.3	1.4	1.4	1.2	1.33	1.34	1.34	1.28	1.29	1.38	1.35	1.26	1.32	1.31	1.31	1.13	1.32	1.31	1.31	1.27	1.32	1.3	1.3	0.6	0.64	0.69	0.67	0.61	0.62	0.65	0.65	0.61	0.67	0.66	0.66	0.63	0.68	0.63	0.63
	46	129.6	132	141.6	130.2	129.33	126.78	138.06	134.21	1.2	1.3	1.3	1.2	1.14	1.23	1.21	1.28	1.11	1.18	1.07	1.09	1.07	1.17	1.06	1.17	1.09	1.12	1.13	1.1	1.06	1.17	1.07	1.17	0.53	0.54	0.56	0.56	0.53	0.58	0.54	0.52	0.57	0.61	0.54	0.53	0.51	0.57	0.51	0.63
	47	111	126	129	130.2	112.11	127.59	128.99	132.19	1	1.3	1.3	1.3	1	1.24	1.34	1.28	1.12	1.25	1.22	1.22	1.07	1.17	1.25	1.17	1.14	1.25	1.24	1.21	1.07	1.17	1.25	1.17	0.59	0.65	0.64	0.62	0.53	0.56	0.61	0.58	0.53	0.6	0.59	0.6	0.52	0.59	0.62	0.57
	48	103.2	100.2	102.6	103.8	101.71	100.71	102.63	104.24	1	1	1	1	1	1	1	1.08	1.13	1.12	1.14	1.2	1.19	1.21	1.17	1.25	1.16	1.17	1.17	1.2	1.18	1.2	1.17	1.25	0.54	0.57	0.58	0.62	0.59	0.61	0.57	0.61	0.61	0.58	0.58	0.58	0.57	0.57	0.58	0.62
	49	136.2	131.4	118.8	113.4	132.79	132.49	116.13	116.65	1.4	1.4	1.2	1.1	1.34	1.4	1.13	1.16	1.26	1.3	1.17	1.16	1.23	1.26	1.18	1.2	1.27	1.29	1.16	1.15	1.21	1.27	1.18	1.19	0.65	0.66	0.62	0.57	0.61	0.61	0.57	0.58	0.62	0.63	0.55	0.57	0.59	0.63	0.59	0.59
	50	107.4	109.8	115.8	109.2	106.49	106.85	109.87	111.07	0.9	1	1	1	0.93	0.99	1.01	1.02	1.01	1.06	1.05	1.13	1.05	1.11	1.1	1.11	1	1.07	1.08	1.12	1.05	1.11	1.1	1.11	0.51	0.57	0.58	0.57	0.5	0.54	0.53	0.53	0.5	0.49	0.5	0.54	0.53	0.55	0.55	0.56
	51	126	129.6	131.4	133.2	129.08	134.5	136.03	138.56	1.3	1.3	1.4	1.4	1.27	1.35	1.37	1.38	1.18	1.2	1.31	1.22	1.23	1.21	1.21	1.22	1.24	1.27	1.3	1.26	1.19	1.22	1.24	1.22	0.61	0.61	0.64	0.62	0.61	0.61	0.58	0.57	0.61	0.63	0.66	0.62	0.58	0.58	0.63	0.63
	52	112.2	118.8	121.2	129.6	113.28	118.77	121.87	127.46	1.1	1.2	1.2	1.3	1.1	1.1	1.19	1.32	1.2	1.2	1.21	1.25	1.17	1.12	1.17	1.24	1.19	1.23	1.24	1.23	1.17	1.12	1.18	1.26	0.61	0.63	0.62	0.62	0.58	0.56	0.58	0.64	0.58	0.58	0.6	0.62	0.57	0.54	0.57	0.59
	53	115.2	115.8	118.2	114.6	117.27	117.34	116	117.09	1.1	1.1	1.2	1.1	1.03	1.02	1.04	1.03	1.11	1.09	1.18	1.16	1.07	1.05	1.08	1.09	1.16	1.09	1.17	1.17	1.07	1.05	1.05	1.07	0.57	0.55	0.61	0.59	0.54	0.51	0.55	0.61	0.56	0.54	0.56	0.57	0.51	0.52	0.5	0.46
	54	108.6	106.2	112.2	117	104.32	104.71	105.43	113.34	1.1	1.1	1.1	1.2	1.02	1.09	1.02	1.18	1.23	1.27	1.16	1.19	1.18	1.25	1.17	1.25	1.16	1.25	1.15	1.22	1.18	1.26	1.18	1.27	0.61	0.64	0.61	0.62	0.56	0.6	0.57	0.6	0.59	0.63	0.55	0.58	0.6	0.64	0.59	0.64
	55	113.4	114	115.8	111.6	114.67	115.03	112.75	111.8	1.3	1.3	1.3	1.3	1.36	1.35	1.32	1.32	1.39	1.39	1.42	1.36	1.44	1.42	1.42	1.43	1.42	1.41	1.37	1.38	1.43	1.41	1.41	1.42	0.71	0.71	0.71	0.7	0.69	0.71	0.68	0.67	0.7	0.7	0.69	0.67	0.72	0.69	0.71	0.73
	56	128.4	111.6	112.8	114	118.19	112.43	113.99	114.09	1.5	1.2	1.2	1.2	1.41	1.24	1.26	1.28	1.35	1.33	1.34	1.29	1.43	1.33	1.33	1.36	1.38	1.26	1.3	1.29	1.44	1.33	1.33	1.34	0.68	0.66	0.65	0.65	0.71	0.66	0.66	0.69	0.68	0.63	0.67	0.63	0.7	0.65	0.65	0.64
	57	119.4	115.8	117.6	115.2	116.95	113.09	115.87	115.08	1.3	1.4	1.3	1.3	1.27	1.34	1.35	1.26	1.34	1.49	1.37	1.36	1.31	1.43	1.41	1.31	1.27	1.46	1.32	1.32	1.3	1.42	1.41	1.32	0.67	0.72	0.66	0.66	0.64	0.7	0.69	0.64	0.64	0.75	0.68	0.68	0.65	0.71	0.7	0.66
	58	118.2	116.4	111	108.6	113.45	111.91	109.19	107.72	1.4	1.3	1.2	1.2	1.35	1.31	1.27	1.28	1.36	1.34	1.35	1.37	1.43	1.42	1.41	1.43	1.39	1.24	1.29	1.3	1.42	1.41	1.4	1.42	0.68	0.64	0.66	0.66	0.7	0.71	0.69	0.7	0.69	0.65	0.66	0.67	0.71	0.69	0.7	0.71
	59	100.2	96.6	95.4	97.8	95.45	95.43	90.86	94.47	1.2	1.2	1.2	1.2	1.21	1.23	1.12	1.13	1.46	1.48	1.47	1.44	1.52	1.55	1.47	1.44	1.46	1.45	1.45	1.39	1.52	1.56	1.48	1.44	0.71	0.73	0.72	0.71	0.76	0.75	0.72	0.72	0.75	0.74	0.73	0.7	0.74	0.78	0.74	0.7
[truncated: 112 more columns]

## Sheet: sample characterization
	Subject	Age	Physical activity per week (days)	Gender (1: female; 2: male)	Weight (kg)	Height (cm)
	1	65	4+	1	64	162
	2	70	2	1	91	163
	3	81	3	2	80	164
	4	69	4+	1	90	160
	5	79	4+	1	64	151
	6	73	3	1	77	170
	7	71	3	1	84	161
	8	68	4+	1	63	158
	9	83	3	2	68	173
	10	72	3	1	53	145
	11	71	3	1	68	148
	12	65	4+	1	54	160
	13	76	2	1	75	160
	14	77	4+	2	81	170
	15	73	3	1	60	157
	16	71	3	1	54	147
	17	75	2	1	83	164
	18	83	3	1	69	153
	19	71	4+	1	70	153
	20	66	3	1	68	172
	21	68	3	1	62	150
	22	73	3	1	64	171
	23	81	4+	2	52	160
	24	75	3	1	75	164
	25	69	3	1	49	150
	26	71	2	1	60	174
	27	70	2	2	95	186
	28	65	3	1	82	167
	29	65	2	1	69	169
	30	78	3	1	60	149
	31	69	4+	1	84	160
	32	72	3	1	57	147
	33	65	4+	1	78	159
	34	65	2	1	70	161
	35	87	3	1	50	149
	36	66	3	1	73	159
	37	66	4+	1	77	161
	38	66	2	1	78	162
	39	65	2	1	74	162
	40	69	3	1	79	161
	41	71	2	1	82	158
	42	67	3	1	78	159
	43	67	3	1	73	159
	44	61	2	1	60	157
	45	67	4+	1	64	163
	46	79	2	1	70	159
	47	76	2	1	62	150
	48	70	3	1	63	159
	49	75	3	1	62	158
	50	71	2	1	87	158
	51	74	3	1	61	160
	52	77	3	1	58	144
	53	70	2	1	96	162
	54	67	2	1	50	171
	55	67	3	2	72	179
	56	66	3	2	95	172
	57	70	4+	1	60	166
	58	67	4+	1	59	155
	59	74		2	70	166
